# Supplementary material for: Prospecting Biomarkers for Diagnostic and Therapeutic Approaches in Pythiosis
Source: MDPI journal article supplement (doi:10.3390/jof7060423), 2021-05-28
Supplement: s1 [file s1]

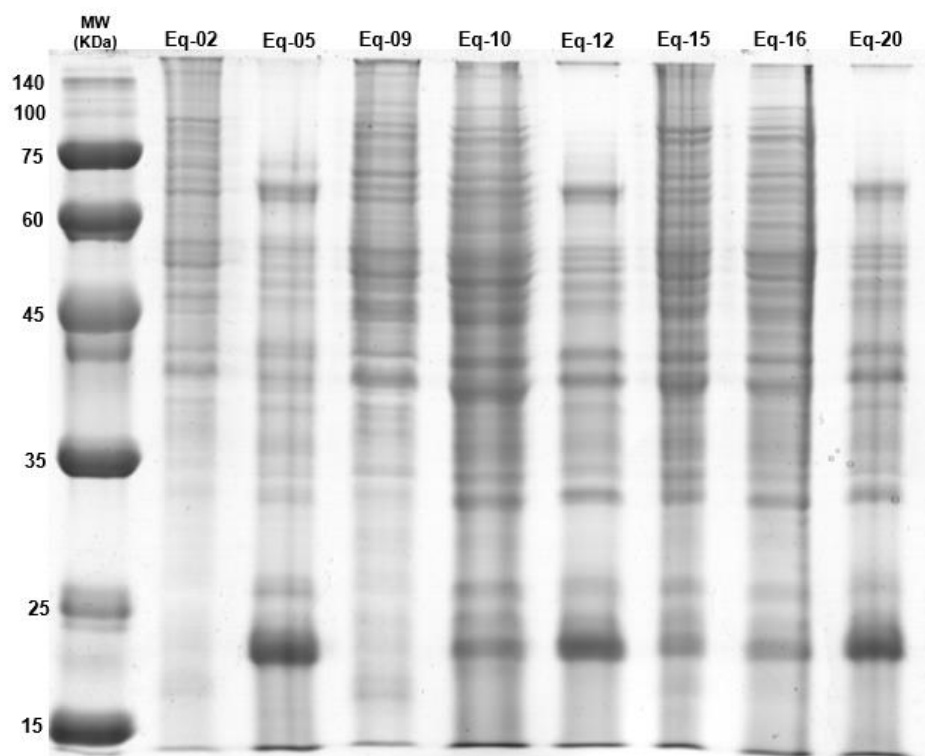

**Fig S1** - The protein profiles of the eight different *Pythium insidiosum* isolates show that are similar in terms of the number and molecular weight of bands observed in the unidimensional electrophoresis.

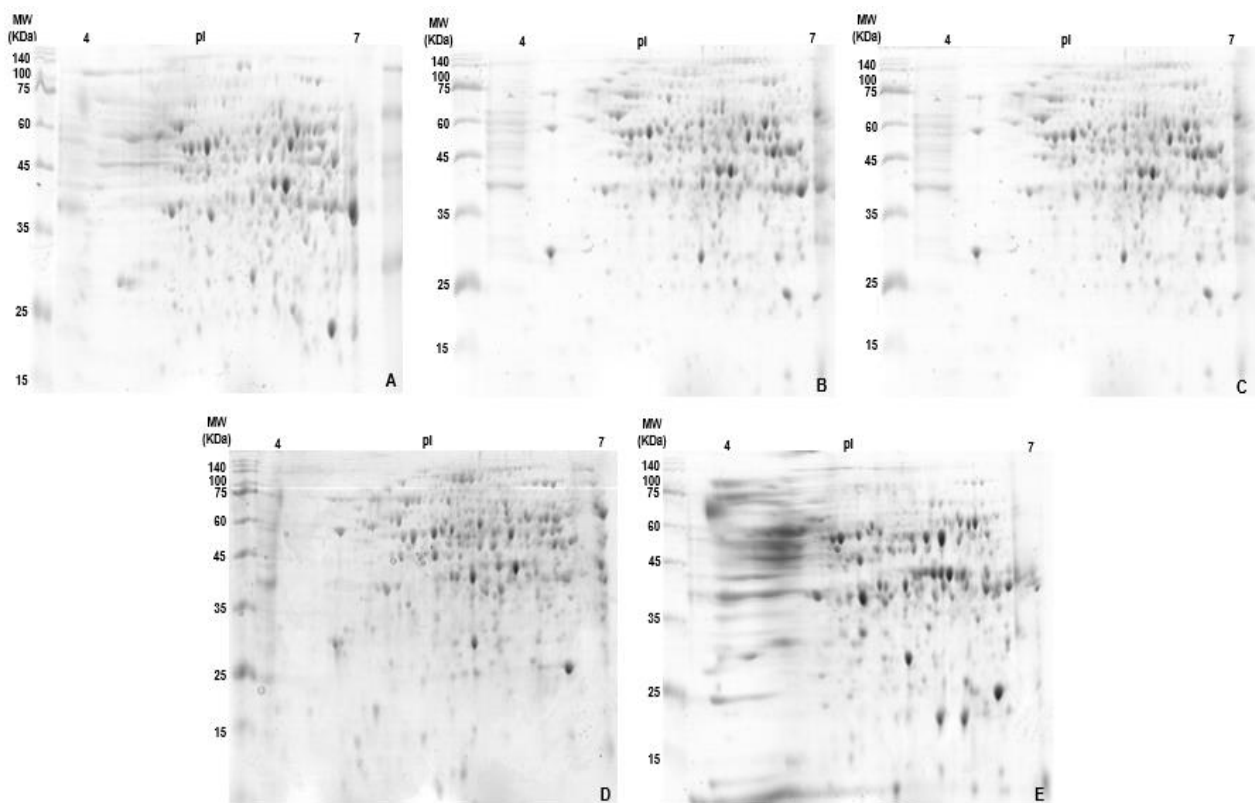

**Fig S2** - *Pythium insidiosum* proteins fractionated using strips of 7cm and pH 4-7, in the first dimension, and 12.5% polyacrylamide gels in the second dimension. (A) *Pythium insidiosum* denominated "Eq-10". (B) "Eq-12". (C) "Eq-15". (D) "Eq-16". (E) "Eq-20".

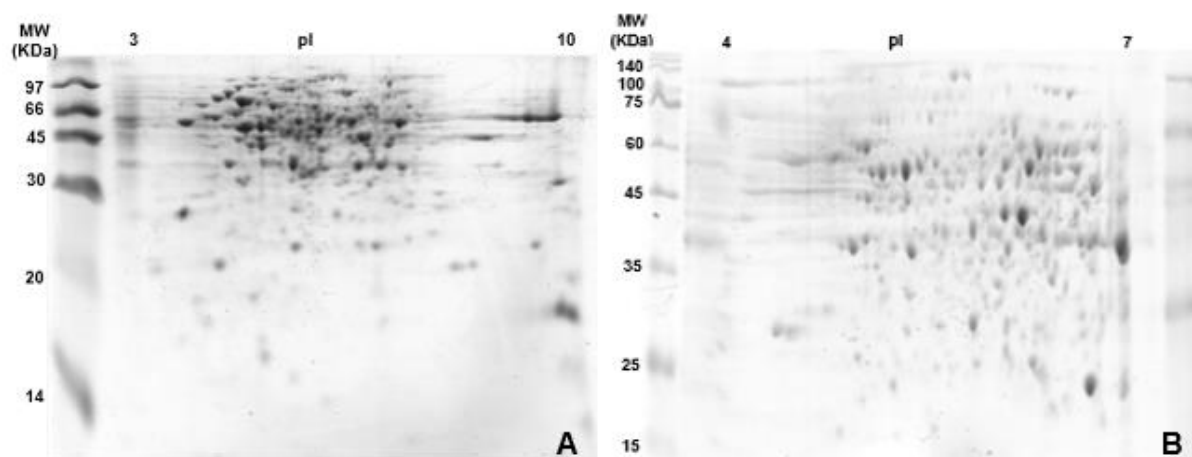

**Fig S3** - Proteins (150  $\mu$ g) of *Pythium insidiosum* (Eq-10) resolved by two-dimensional gel electrophoresis. (A) IPG strips ranging from 3 to 10. (B) Separation of spots by isoelectric point using strips with a pH range of 4-7.
